# Supplementary material for: G392E neuroserpin causing the dementia FENIB is secreted from cells but is not synaptotoxic
Source: PubMed Central journal article supplement (PMC8062559; doi:10.1038/s41598-021-88090-1), 2021-04-22
Supplement: 41598_2021_88090_MOESM1_ESM.pdf [file 41598_2021_88090_MOESM1_ESM.pdf]

## Supplementary material

### **G392E neuroserpin causing the dementia FENIB is secreted from cells but is not synaptotoxic**

Thies Ingwersen<sup>#,1,2</sup>, Christian Linnenberg<sup>#,1</sup>, Emanuela D'Acunto<sup>3</sup>, Shabnam Temori<sup>1</sup>, Irene Paolucci<sup>1</sup>, David Wasilewski<sup>1</sup>, Behnam Mohammadi<sup>1</sup>, Johannes Kirchmair<sup>4,5</sup>, Robert C. Glen<sup>4,6</sup>, Elena Miranda<sup>3,7</sup>, Markus Glatzel<sup>1</sup>, Giovanna Galliciotti<sup>1,\*</sup>

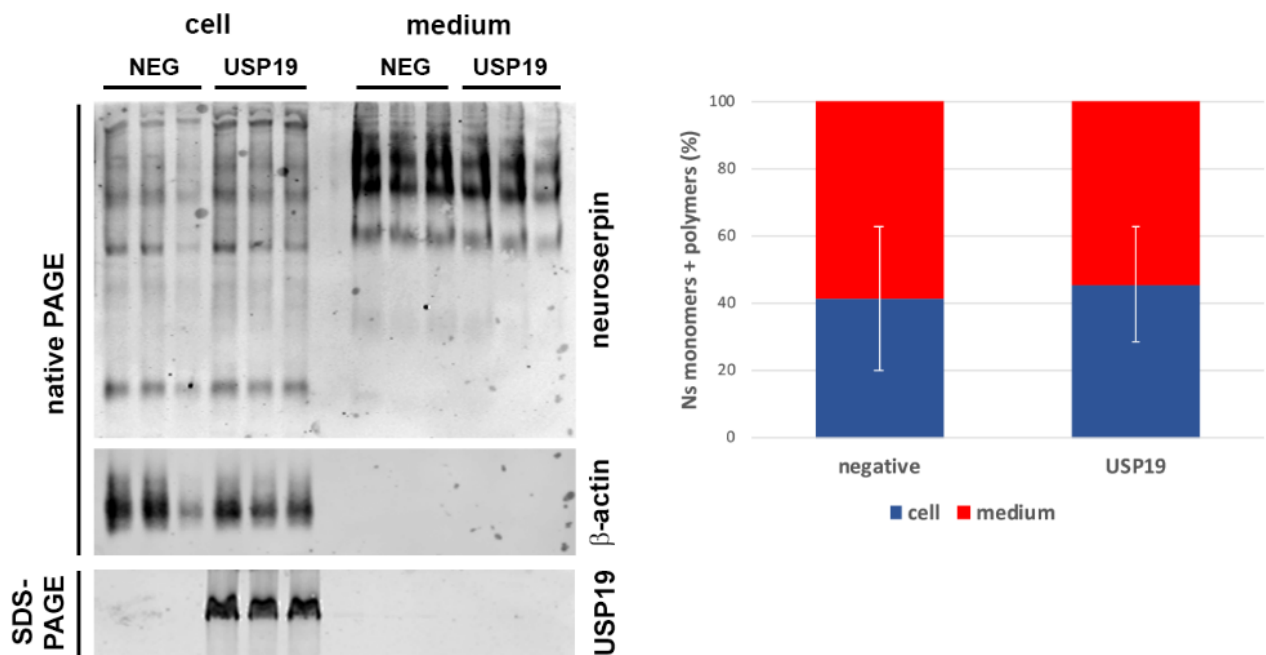

**Supplementary Figure S1: Overexpression of USP19 does not increase G392E neuroserpin secretion.**

HEK-293 cells overexpressing G392E-mutant neuroserpin were transiently transfected with a construct encoding mCitrine-USP19. After overnight incubation, cell extracts (cell) and culture media (medium) were collected and analyzed by non-denaturing PAGE followed by western blot using an anti-neuroserpin antibody. Beta-actin was used as loading control. In parallel, the same samples were subjected to SDS-PAGE and western blot analysis with anti-GFP antibody to assess the efficiency of mCitrine-USP19 transfection (bottom panel, USP19). The bar graph shows densitometric quantification of neuroserpin signal. Intensity revealed unchanged distribution of G392E-mutant neuroserpin in cells overexpressing mCitrine-USP19, implying that MAPS is not involved in secretion of mutant neuroserpin. Three independent experiments with three technical replicates each were performed and a representative one is shown. Values are mean +/- SD; n=3; p=0,6675.

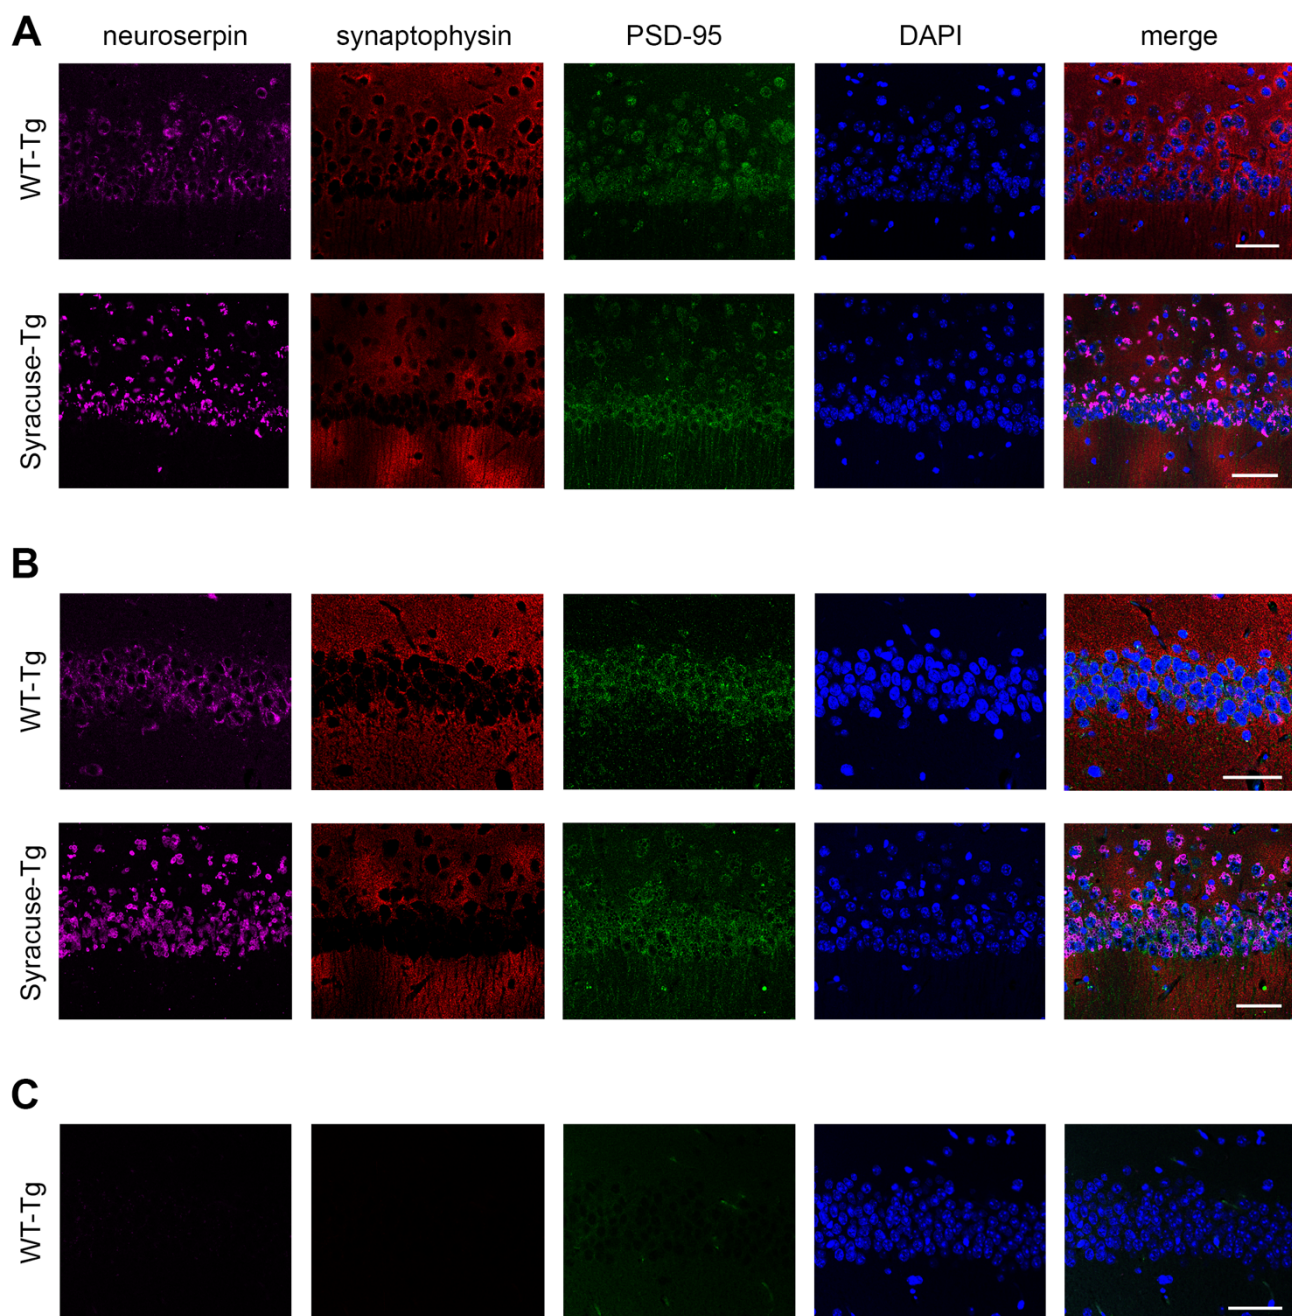

**Supplementary Figure S2: Immunohistochemical stainings of neuroserpin, the pre-synaptic marker synaptophysin and the post-synaptic marker PSD-95 in the CA1 region of the hippocampus of transgenic mice overexpressing wild-type or S49P-Syracuse mutant neuroserpin.**

Mice aged 45 (A) and 80 weeks (B) were analyzed. In C, as a negative control, sections from an 80 weeks old mouse were stained with the secondary antibody only. Scale bar, 50  $\mu$ m.

**uncropped membranes shown in figure 1**

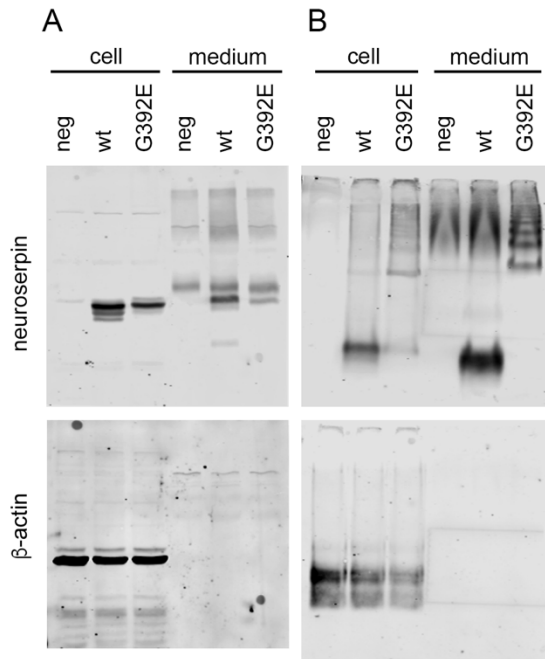

**uncropped membranes shown in figure 2**

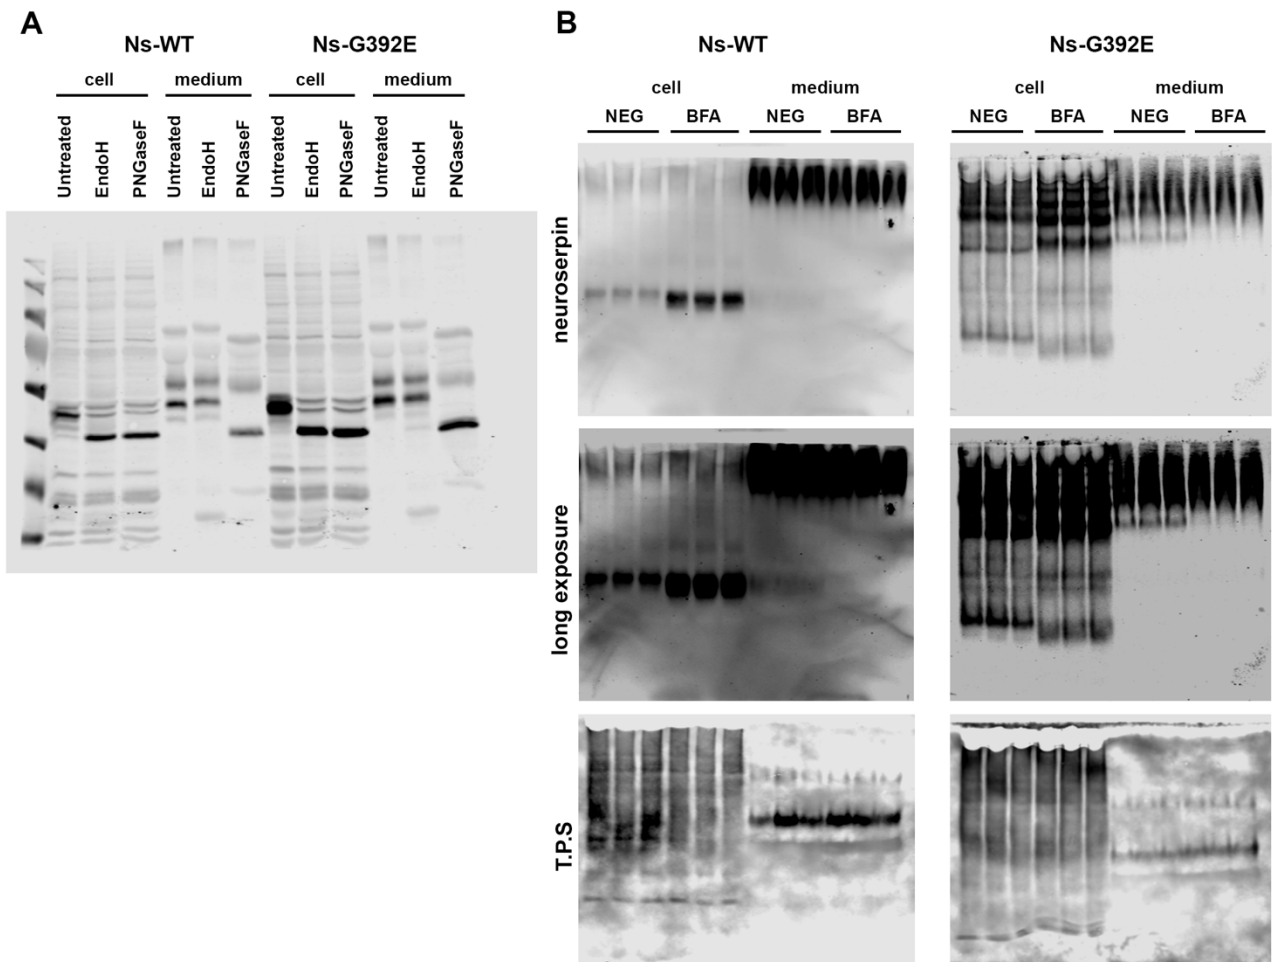

**uncropped membranes shown in figure 3**

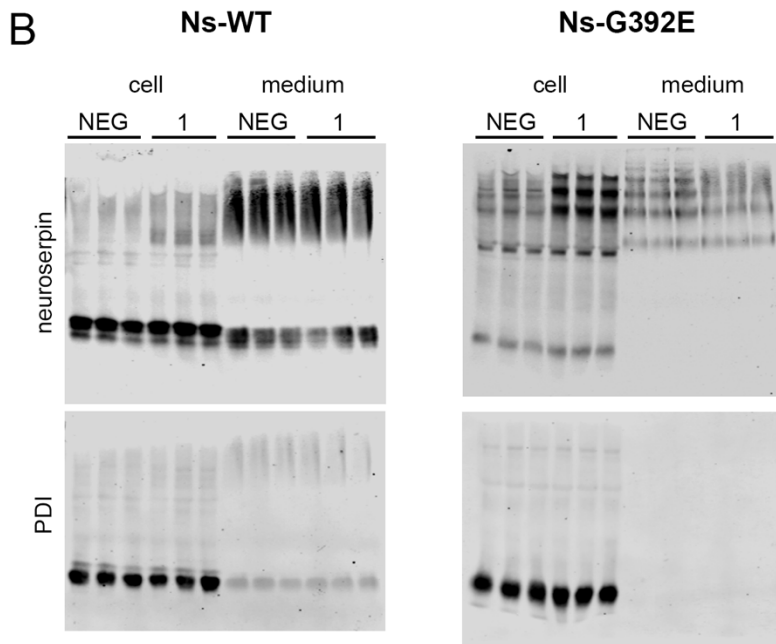

**uncropped membranes shown in figure 5**

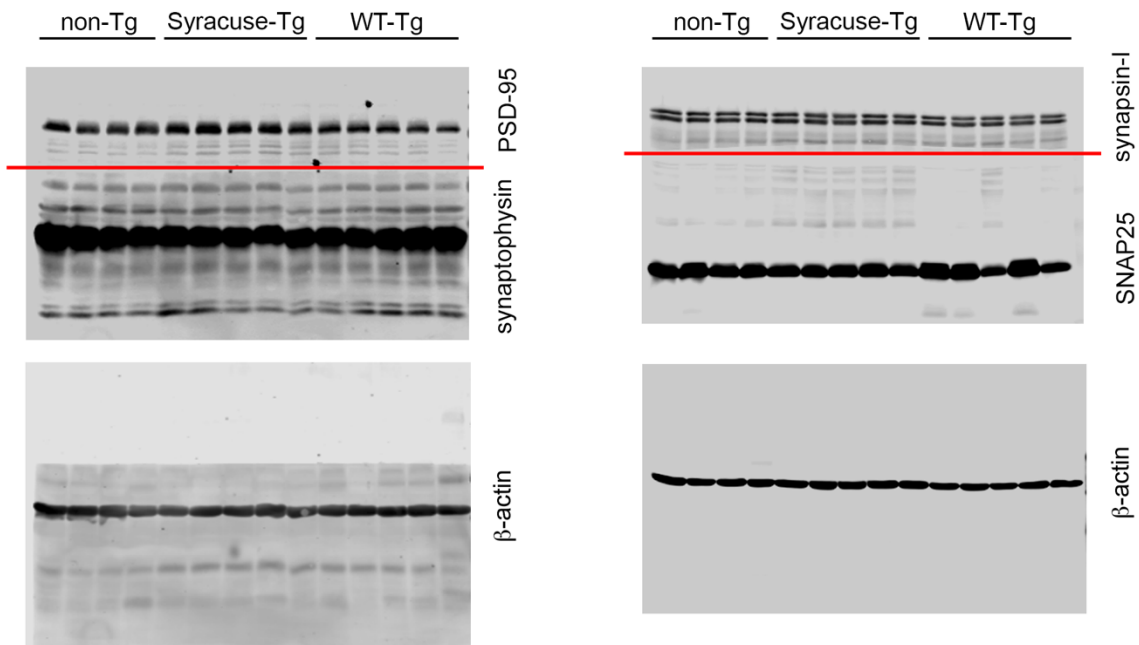

**Supplementary Figure S3: Full-length blots.**

Shown are the full-length blots depicted in Figure 1a, 1b, 2a, 2b, 3b and 5 before cropping. After blotting, the membranes of Figure 5 were cut in two pieces (s. red line), the upper part was probed with antibodies against PSD-95 or synapsin-I, the lower part with antibodies against synaptophysin, SNAP25 and beta-actin.

| LDH assay |        |        |        |        |        |        |         |        |                            |
|-----------|--------|--------|--------|--------|--------|--------|---------|--------|----------------------------|
|           | 1      | 2      | 3      | 4      | 5      | 6      | average | SD     | p-value<br>(One-way ANOVA) |
| negative  | 0,2943 | 0,2930 | 0,2810 | 0,2777 | 0,2710 | 0,2877 | 0,2841  | 0,0092 | 0,4472                     |
| wild-type | 0,2890 | 0,2800 | 0,2770 | 0,2823 | 0,2780 | 0,2680 | 0,2791  | 0,0069 |                            |
| G392E     | 0,2880 | 0,2823 | 0,2803 | 0,2790 | 0,2860 | 0,2805 | 0,2827  | 0,0036 |                            |

| Cleaved caspase 3 |        |        |        |        |        |        |         |        |                            |
|-------------------|--------|--------|--------|--------|--------|--------|---------|--------|----------------------------|
|                   | 1      | 2      | 3      | 4      | 5      | 6      | average | SD     | p-value<br>(One-way ANOVA) |
| negative          | 0,2700 | 0,2200 | 0,4300 | 0,3206 | 0,1320 | 0,5089 | 0,3136  | 0,1381 | 0,3146                     |
| wild-type         | 0,3540 | 0,3460 | 0,4640 | 0,5739 | 0,4348 | 0,1214 | 0,3824  | 0,1526 |                            |
| G392E             | 0,2040 | 0,4280 | 0,9300 | 0,4054 | 0,4848 | 0,4244 | 0,4794  | 0,2409 |                            |

| Synaptic puncta - recombinant neuroserpin (20nM) |        |        |        |        |        |        |         |        |                            |
|--------------------------------------------------|--------|--------|--------|--------|--------|--------|---------|--------|----------------------------|
| Puncta density / Area                            | 1      | 2      | 3      | 4      | 5      | 6      | average | SD     | p-value<br>(One-way ANOVA) |
| negative                                         | 1,4203 | 0,6624 | 0,7040 | 1,0913 | 0,8646 | 1,2575 | 1,0000  | 0,3070 | 0,3030                     |
| wild-type                                        | 2,0891 | 0,7856 | 1,2407 | 1,1440 | 0,7064 |        | 1,1932  | 0,5501 |                            |
| G392E                                            | 1,6770 | 0,9739 | 1,7225 | 1,7396 | 0,8799 | 1,3373 | 1,3884  | 0,3876 |                            |
| Puncta Area                                      | 1      | 2      | 3      | 4      | 5      | 6      | average | SD     | p-value<br>(One-way ANOVA) |
| negative                                         | 1,2013 | 0,8371 | 1,0482 | 0,8632 | 1,1570 | 0,8932 | 1,0000  | 0,1576 | 0,5177                     |
| wild-type                                        | 1,4243 | 0,9531 | 1,0850 | 0,9112 | 1,0950 |        | 1,0937  | 0,2015 |                            |
| G392E                                            | 1,4675 | 1,0011 | 0,9531 | 1,0131 | 1,1330 | 1,1344 | 1,1170  | 0,1868 |                            |

| Synaptic puncta - recombinant neuroserpin (100nM) |        |        |        |        |  |  |         |        |                            |
|---------------------------------------------------|--------|--------|--------|--------|--|--|---------|--------|----------------------------|
| Puncta density / Area                             | 1      | 2      | 3      | 4      |  |  | average | SD     | p-value<br>(One-way ANOVA) |
| negative                                          | 1,0674 | 0,6504 | 1,1028 | 1,1794 |  |  | 1,0000  | 0,2377 | 0,9810                     |
| wild-type                                         | 0,8272 | 0,7211 | 1,3107 | 1,1398 |  |  | 0,9997  | 0,2731 |                            |
| G392E                                             | 0,7902 | 0,5988 | 1,1863 | 1,2889 |  |  | 0,9661  | 0,3258 |                            |
| Puncta Area                                       | 1      | 2      | 3      | 4      |  |  | average | SD     | p-value<br>(One-way ANOVA) |
| negative                                          | 1,1037 | 0,8398 | 1,0062 | 1,0502 |  |  | 1,0000  | 0,1140 | 0,4255                     |
| wild-type                                         | 1,0857 | 1,0857 | 1,0257 | 1,4636 |  |  | 1,1652  | 0,2009 |                            |
| G392E                                             | 1,0377 | 0,8638 | 1,2922 | 1,1757 |  |  | 1,0924  | 0,1845 |                            |

| Synaptic puncta - HEK-293 co-culture |        |        |        |        |        |        |         |        |                            |
|--------------------------------------|--------|--------|--------|--------|--------|--------|---------|--------|----------------------------|
| Puncta density / Area                | 1      | 2      | 3      | 4      | 5      | 6      | average | SD     | p-value<br>(One-way ANOVA) |
| negative                             | 2,0028 | 1,2711 | 1,0543 | 0,4996 | 0,4332 | 0,7389 | 1,0000  | 0,5868 | 0,4790                     |
| wild-type                            | 2,3429 | 2,0099 | 1,0927 | 0,7295 | 1,1615 | 1,1601 | 1,4161  | 0,6193 |                            |
| G392E                                | 1,8757 | 1,8401 | 1,0494 | 1,1236 | 0,6789 | 0,7176 | 1,2142  | 0,5287 |                            |
| Puncta Area                          | 1      | 2      | 3      | 4      | 5      | 6      | average | SD     | p-value<br>(One-way ANOVA) |
| negative                             | 1,7480 | 1,1216 | 0,8160 | 0,8012 | 0,6676 | 0,8457 | 1,0000  | 0,3955 | 0,8181                     |
| wild-type                            | 1,4599 | 1,3110 | 1,0311 | 0,8838 | 0,9792 | 1,0682 | 1,1222  | 0,2182 |                            |
| G392E                                | 1,0682 | 1,6913 | 0,8833 | 1,3575 | 0,6053 | 0,9235 | 1,0882  | 0,3844 |                            |

**Supplementary Table S1: Lack of cell and synaptic toxicity of G392E-mutant neuroserpin in primary hippocampal neurons.**

Data obtained from treatments of primary hippocampal neurons with either human recombinant neuroserpin or by co-culture with HEK-293 cells overexpressing neuroserpin. Neuronal toxicity was analyzed by LDH activity in the culture medium and caspase 3 activation. For analysis of synaptic toxicity (density and area of synaptic puncta) value for the negative control was set to 1.
